# Supplementary material for: Massively parallel characterization of engineered transcript isoforms using direct RNA sequencing
Source: PubMed Central journal article supplement (PMC8783025; doi:10.1038/s41467-022-28074-5), 2022-01-21
Supplement: 41467_2022_28074_MOESM2_ESM.pdf [file 41467_2022_28074_MOESM2_ESM.pdf]

**Title:** Supplementary Data 1:

**Description:** Annotated plasmid sequences for all transcriptional valve libraries.

**Title:** Supplementary Data 2:

**Description:** Termination efficiency of studied transcriptional valves.
